# Supplementary material for: Hexagonal, hollow, aluminium-containing ZSM-5 tubes prepared from mesoporous silica templatesElectronic supplementary information (ESI) available: XRD patterns for MS and MS coated with silicalite-1 during the hydrothermal synthesis procedure. See http://www.rsc.org/suppdata/cc/b4/b406753c/
Source: Royal Society of Chemistry journal article supplement (doi:10.1039/b406753c), 2004-01-01
Supplement: b406753c.pdf [file b406753c.pdf]

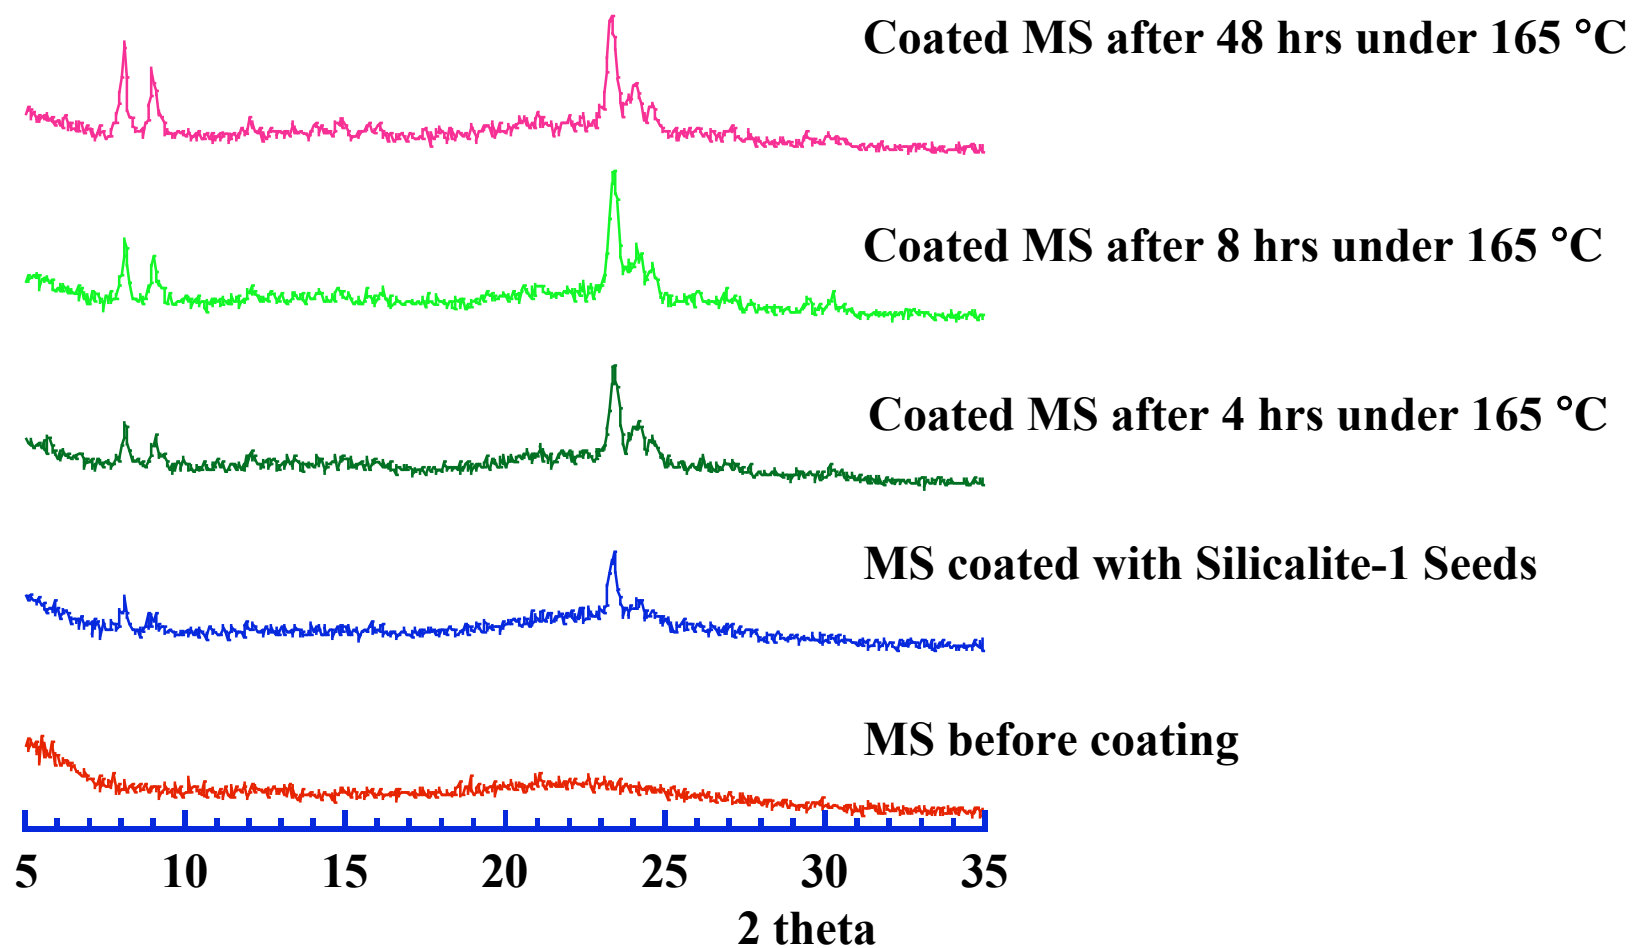

**Figure S1.** XRD patterns for mesoporous silica (MS) and MS coated with silicalite-1 during the hydrothermal synthesis procedure.
